# Supplementary material for: ‘ARMAN’ archaea depend on association with euryarchaeal host in culture and in situ
Source: PubMed Central journal article supplement (PMC5498576; doi:10.1038/s41467-017-00104-7), 2017-07-05
Supplement: 41467_2017_104_MOESM1_ESM.pdf [file 41467_2017_104_MOESM1_ESM.pdf]

**File name:** Supplementary Information

**Description:** Supplementary Figures, Supplementary Tables and Supplementary References

**File name:** Supplementary Data 1

**Description:** Groups of similar proteins identified in *C. divulgatum*-related and “*Ca. Mancarchaeum acidiphilum*” genomes.

**File name:** Supplementary Data 2

**Description:** Detailed analysis of de novo metagenome sequencing assemblies from Parys Mountain showed that gene clusters similar to abovementioned copper fitness island of MIA14 are widely presented in different metagenomic contigs.

**File name:** Supplementary Data 3

**Description:** 218 archaeal core genes (arCOGs) in Mia14 and two nanoarchaeal genomes.

**File name:** Supplementary Data 4

**Description:** Inference of gene presence for four lineages along the tree of DPANN group leading to Mia14.

**File name:** Supplementary Data 5

**Description:** arCOGs inferred to be lost in Mia14 lineage.

**File name:** Supplementary Data 6

**Description:** Breakdown of best BLASTP hits for Mia14 proteins against all archaea in the phylogenetic tree (Fig. 4) plus two *Cuniculiplasmas* genomes.

**File name:** Peer Review File

**Description:**

## Supplementary Information

**Supplementary Table 1. List of Cation transport ATPases included in the phylogenetic analysis**

| Organism                                                                                                                              | Protein ID |
|---------------------------------------------------------------------------------------------------------------------------------------|------------|
| “ <i>Candidatus</i> Micrarchaeum acidiphilum”<br>ARMAN-2                                                                              | EET90099.1 |
| “ <i>Ferroplasma acidarmanus</i> ” fer1                                                                                               | AGO61360.1 |
| <i>Acidiplasma</i> sp. MBA-1                                                                                                          | KJE49923.1 |
| <i>Acidiplasma aeolicum</i>                                                                                                           | KPV45991.1 |
| <i>Acidiplasma cupricumulans</i>                                                                                                      | KQB34972.1 |
| <i>Picrophilus torridus</i> DSM 9790                                                                                                  | AAT42749.1 |
| <i>Thermoplasma acidophilum</i>                                                                                                       | CAC12269.1 |
| <i>Thermoplasma volcanium</i> GSS1                                                                                                    | BAB60406.1 |
| <i>Thermoplasmatales</i> archaeon “A-plasma”                                                                                          | EQB69441.1 |
| “ <i>Candidatus</i> Parvarchaeum acidophilus”<br>ARMAN-5                                                                              | EFD92740.1 |
| <i>Cuniculiplasma divulgatum</i> S5                                                                                                   | CSP5_0948  |
| <i>Thermoplasmatales</i> archaeon “G-plasma”                                                                                          | EQB69951.1 |
| <i>Cuniculiplasma divulgatum</i> PM4                                                                                                  | CPM_0944   |
| uncultured archaeon, identified by<br>metagenome sequencing of acid sulfate soils<br>from South Australia (Bioproject<br>PRJNA256113_ | AKA49370.1 |
| <i>Thermoplasmatales</i> archaeon “E-plasma”                                                                                          | EQB66611.1 |
| “ <i>Ca.</i> Mancarchaeum acidiphilum”                                                                                                | Mia14_0877 |
| <i>Thermoplasmatales</i> archaeon “I-plasma”                                                                                          | EQB66294.1 |
| <i>Cuniculiplasma divulgatum</i> S5                                                                                                   | CSP5_0082  |
| <i>Thermoplasmatales</i> archaeon “A-plasma”                                                                                          | EQB70551.1 |

**Supplementary Table 2. Type IV pili system genes in Mia14 genome**

|             |                                                                     |
|-------------|---------------------------------------------------------------------|
| MIA14_ 0118 | Pilin/Flagellin, contains class III signal peptide                  |
| MIA14_ 0152 | Surface protein possibly associated with type IV pili like system   |
| MIA14_ 0170 | Pilus assembly protein, ATPase of CpaF family                       |
| MIA14_ 0172 | Pilus assembly protein TadC                                         |
| MIA14_ 0173 | Pilus assembly protein TadC                                         |
| MIA14_ 0176 | Secreted protein, component of type IV pili like system             |
| MIA14_ 0194 | Surface protein, possibly associated with type IV pili like system  |
| MIA14_ 0252 | ATPase involved in archaellum/pili biosynthesis                     |
| MIA14_ 0253 | Pilus assembly protein TadC                                         |
| MIA14_ 0253 | Component of type IV pili system                                    |
| MIA14_ 0254 | Pilin/Flagellin, contains class III signal peptide                  |
| MIA14_ 0255 | Pilin/Flagellin, contains class III signal peptide                  |
| MIA14_ 0256 | Pilin/Flagellin, contains class III signal peptide                  |
| MIA14_ 0257 | Pilin/Flagellin, contains class III signal peptide                  |
| MIA14_ 0258 | Pilin/Flagellin, contains class III signal peptide                  |
| MIA14_ 0259 | Component of type IV pili system, contains class III signal peptide |
| MIA14_ 0260 | Pilin/Flagellin, contains class III signal peptide                  |
| MIA14_ 0342 | S-layer protein, possibly associated with type IV pili like system  |
| MIA14_ 0570 | Peptidase A24A, prepilin type IV                                    |
| MIA14_ 0572 | CARDB cell adhesion domain containing protein                       |
| MIA14_ 0940 | Pilus assembly protein, ATPase of CpaF family                       |
| MIA14_ 0946 | Surface protein, possibly associated with type IV pili like system  |

**Supplementary Table 3. Transporters in Mia14 genome**

|            |                                                                        |
|------------|------------------------------------------------------------------------|
| MIA14_0064 | ABC-type multidrug transport system, permease component                |
| MIA14_0161 | DMT superfamily transporter                                            |
| MIA14_0162 | DMT superfamily transporter                                            |
| MIA14_0187 | MFS family permease                                                    |
| MIA14_0197 | ABC-type multidrug transport system, ATPase component                  |
| MIA14_0198 | ABC-type multidrug transport system, permease component                |
| MIA14_0305 | Predicted transporter component, contains two sulfur transport domains |
| MIA14_0341 | ABC-type antimicrobial peptide transport system, ATPase component      |
| MIA14_0343 | ABC-type antimicrobial peptide transport system, permease component    |
| MIA14_0389 | MFS family permease                                                    |
| MIA14_0393 | Amino acid transporter                                                 |
| MIA14_0395 | MFS family permease                                                    |
| MIA14_0397 | MFS family permease                                                    |
| MIA14_0416 | MFS family permease                                                    |
| MIA14_0426 | Permease of the drug/metabolite transporter (DMT) superfamily          |
| MIA14_0429 | MFS family permease                                                    |
| MIA14_0560 | Predicted metal permease                                               |
| MIA14_0582 | Amino acid transporter                                                 |
| MIA14_0583 | Ammonia permease                                                       |
| MIA14_0584 | Cation transport ATPase                                                |
| MIA14_0591 | Amino acid transporter                                                 |
| MIA14_0655 | ABC-type multidrug transport system, ATPase component                  |
| MIA14_0656 | ABC-type multidrug transport system, permease component                |
| MIA14_0693 | MFS family permease                                                    |

|             |                                                                            |
|-------------|----------------------------------------------------------------------------|
| MIA14_ 0695 | MFS family permease                                                        |
| MIA14_ 0720 | MFS family permease                                                        |
| MIA14_ 0734 | Membrane protein, possible transporter                                     |
| MIA14_ 0760 | Sulfite exporter, TauE/SafE family                                         |
| MIA14_ 0766 | MFS family permease                                                        |
| MIA14_ 0768 | Predicted Fe <sup>2+</sup> /Mn <sup>2+</sup> transporter, VIT1/CCC1 family |
| MIA14_ 0814 | Amino acid transporter                                                     |
| MIA14_ 0888 | Co/Zn/Cd efflux system component                                           |
| MIA14_ 0911 | MFS family permease                                                        |
| MIA14_ 0985 | ABC-type Na <sup>+</sup> efflux pump, permease component                   |
| MIA14_ 1014 | ABC-type multidrug transport system, ATPase component                      |

**Supplementary Table 4. CARD-FISH probes and cell dimensions recognised in this study**

| Probe            | Sequence              | T <sub>hybr</sub> <sup>a</sup> ,<br>°C | T <sub>wash</sub> <sup>b</sup> ,<br>°C | FA <sup>c</sup><br>(%) | Cell<br>dimensions<br>(µm) |
|------------------|-----------------------|----------------------------------------|----------------------------------------|------------------------|----------------------------|
| Thmpt-680R       | GGATTACAGGATTTTACCCCT | 37                                     | 38                                     | 20                     | 0.5 - 1.8                  |
| Clpm-1100R       | CTTCAAAGTTCTACCAAC    | 46                                     | 48                                     | 0                      | 0.5 - 1.8                  |
| ARM-<br>MIA1469R | TTGAGGTGATCTATCCGCAGG | 46                                     | 48                                     | 20                     | 0.4 - 1.2                  |

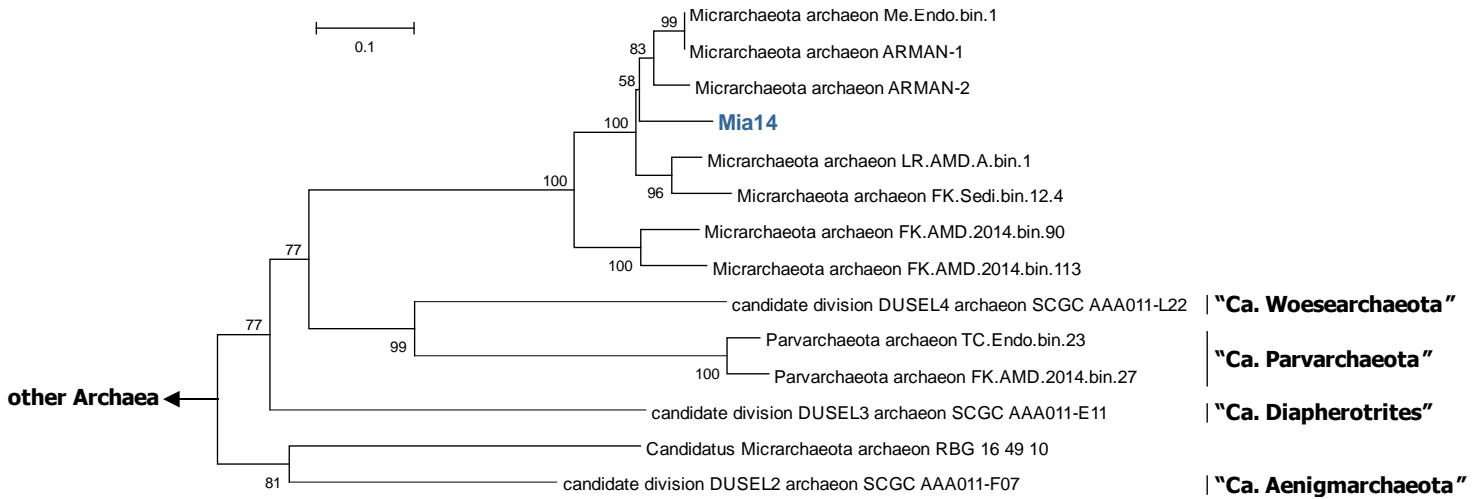

**Supplementary Figure 1. SSU rRNA phylogeny of Mia14 and closely related organisms of "DPANN" superphylum.** Maximum Likelihood tree constructed using methodology described earlier<sup>1</sup>. The analysis involved 150 nucleotide sequences. There were a total of 1264 positions in the final dataset. Scale bar represents 0.1 substitution per nucleotide position.

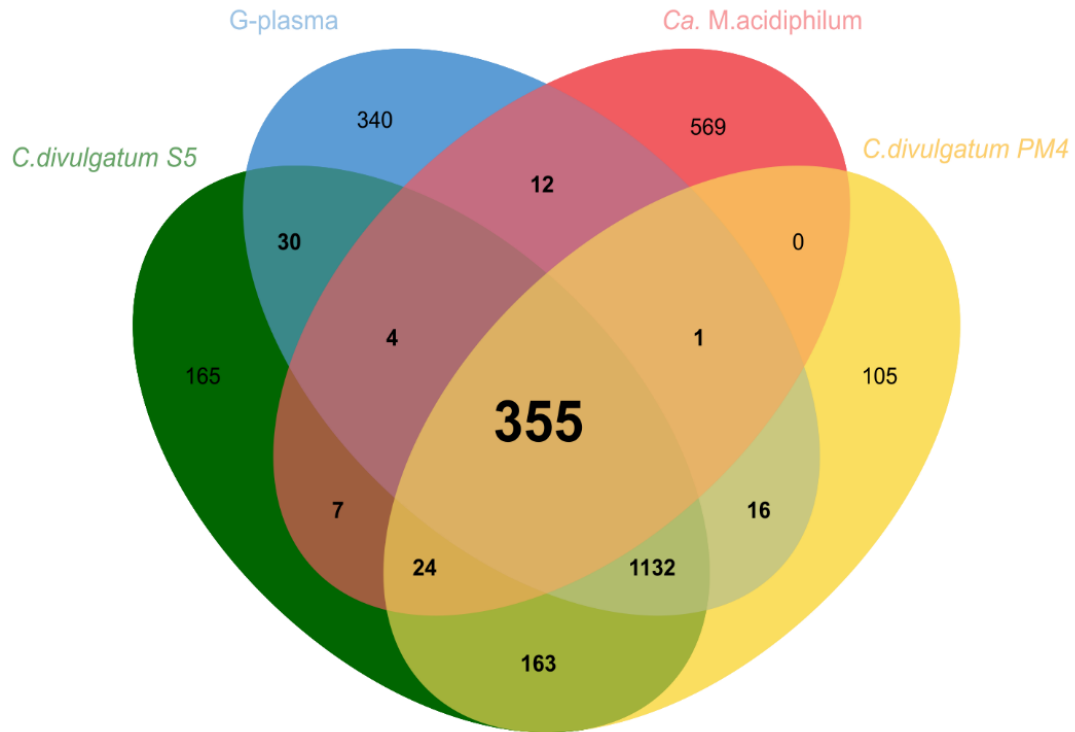

**Supplementary Figure 2. Groups of similar proteins in *C. divulgatum*-related and “*Ca. Mancarchaeum acidiphilum*” genomes.** Protein groups were identified with ProteinOrtho V5.15 (ref. <sup>2</sup>) with default parameters.

### Supplementary References

1. Golyshina, O. V. *et al.* The novel, extremely acidophilic, cell wall-deficient archaeon *Cuniculiplasma divulgatum* gen. nov., sp. nov. represents a new family of *Cuniculiplasmataceae* fam. nov., order *Thermoplasmatales*. *Int. J. Syst. Evol. Microbiol.* **66**, 332-340 (2016).
2. Lechner, M. *et al.* Proteinortho: detection of (co-)orthologs in large-scale analysis. *BMC Bioinformatics* **12**, 124 (2011).
